# Supplementary material for: Positive Deviance for Dual-Method Promotion among Women in Uganda: A Qualitative Study
Source: MDPI journal article supplement (doi:10.3390/ijerph17145009), 2020-07-12
Supplement: s1 [file s1]

**Table S3: Interview Guide****In-depth interview guideline**

|                       |  |
|-----------------------|--|
| Date of interview:    |  |
| Interview start time: |  |
| Participant's code:   |  |
| Interviewer:          |  |

When dual-method use was/has been practiced.

| Topic Focus                                         | Core questions                                                                   | Additional questions or prompts                                                                                                                                                                                                                                                                                                                                                                                                                                                                                                                                                                                                                                                                            |
|-----------------------------------------------------|----------------------------------------------------------------------------------|------------------------------------------------------------------------------------------------------------------------------------------------------------------------------------------------------------------------------------------------------------------------------------------------------------------------------------------------------------------------------------------------------------------------------------------------------------------------------------------------------------------------------------------------------------------------------------------------------------------------------------------------------------------------------------------------------------|
| <b>Reasons and motivations for dual-method use</b>  | Why and how do you practice dual-method use with your spouse or live-in partner? | <p>Why do you use condoms with your spouse or live-in sexual partner even when you are using other forms of family planning methods?</p> <p>What are barriers/problems to using condoms with other family planning methods (dual-method use) with your spouse or live-in sexual partner?</p> <p>What kinds problems/challenges did/do you have?</p> <ul style="list-style-type: none"> <li>- In terms of access to family planning and condoms</li> <li>- In terms of communication with your partner</li> <li>- In terms of social stigma about condom use</li> <li>- In terms of side effects etc.</li> </ul> <p>Have these challenges been overcome? If yes, how did you overcome these challenges?</p> |
| <b>Negotiation and communication for condom use</b> | How do you communicate/negotiate with your partner about condom use?             | <p>Who decided to use family planning and why?</p> <p>When did you or/and your partner decide to use family planning?</p> <p>Have you ever discussed family planning with your partner, other family members, health workers etc.? If yes, how often do you discuss with them?</p> <p>Who normally decide to use condoms and why?</p> <p>Have any risks been considered or discussed with your partner? What risks?</p> <p>Do you find it easy to discuss the issue of protection with your partner? Who led the discussion?</p>                                                                                                                                                                           |

|                                                                      |                                                                                                                                  |                                                                                                                                                                                                                                                                                                                                                                                                                                                                                                                                                                                                                                                                                                                                                                                                                                                                                                                                                                                  |
|----------------------------------------------------------------------|----------------------------------------------------------------------------------------------------------------------------------|----------------------------------------------------------------------------------------------------------------------------------------------------------------------------------------------------------------------------------------------------------------------------------------------------------------------------------------------------------------------------------------------------------------------------------------------------------------------------------------------------------------------------------------------------------------------------------------------------------------------------------------------------------------------------------------------------------------------------------------------------------------------------------------------------------------------------------------------------------------------------------------------------------------------------------------------------------------------------------|
| <p><b>Perceptions of condom use and contraception</b></p>            | <p>What do you think about using condoms with your partner?</p>                                                                  | <p>What has your use of condoms with other family planning methods been like with your partner?</p> <p>After you started using family planning methods, have you seen any changes in your perception about condom use?</p> <p>After you started using family planning methods, have you seen any changes in your partner's perception about condom use?</p> <p>Whose responsibility is protection about HIV/STIs? Why?</p> <p>Whose responsibility is protection about unintended pregnancies? Why?</p> <p>How do you feel about not using protection for HIV/STIs? How does your partner feel?</p> <p>Have any actions been taken when protection wasn't used (if there was such a case)?</p>                                                                                                                                                                                                                                                                                   |
| <p><b>Risk perceptions for unintended pregnancy and HIV/STIs</b></p> | <p>To what extent do you think about any risks involved with sex?</p> <p>What action do you take in relation to these risks?</p> | <p>Do you consider yourself to be at risk of pregnancy? Why? Why not?</p> <ul style="list-style-type: none"> <li>- Have you ever been pregnant? What happened? What did you do? How did you feel? How did other people react? Has it changed your behavior?</li> <li>- How would you feel if you found out you were pregnant? What would you do? Why?</li> </ul> <p>Do you consider yourself to be at risk of HIV/STIs? Why? Why not?</p> <ul style="list-style-type: none"> <li>- Have you had a STI or symptom? Have your partner had a STI or symptom? What happened? What did you do? How did you feel? Has it changed your behavior?</li> <li>- Have you ever had an HIV test? Have any of your partners had an HIV test? Why? Why not?</li> <li>- Have you ever asked a partner to have a test? Why? Why not?</li> <li>- Have you ever had multiple sex partners? Have you ever been paid for sex? Do you use protection during these encounters? Why? Why not?</li> </ul> |

|                                     |                                                                                                                                           |                                                                                                                                                                                                                                                                                                                                                                               |
|-------------------------------------|-------------------------------------------------------------------------------------------------------------------------------------------|-------------------------------------------------------------------------------------------------------------------------------------------------------------------------------------------------------------------------------------------------------------------------------------------------------------------------------------------------------------------------------|
| <b>Knowledge of dual-method use</b> | <p>Which forms of protection against pregnancy and STIs have you used?</p> <p>What, why, when and how was its use or non-use decided?</p> | <p>Which family planning method have you used/do you use? Since when? Why? Where were/are the methods obtained from?</p> <p>Have you used condoms throughout the years? Why? Why not?</p> <p>How do you decide when to use them?</p> <p>Under what circumstances do you/ would you not use them (if there was such a case)? Why? Reasons for engaging in unprotected sex.</p> |
|                                     | <p>To what extent do you know about dual-method use?</p>                                                                                  | <p>Do you know family planning methods are not 100% protection against pregnancy?</p> <p>Have you ever considered using condoms to prevent pregnancy?</p> <p>Have you attended family planning counseling?</p> <p>Have you ever learnt how to use condoms?</p> <p>Have you ever heard of dual-method use?</p>                                                                 |

When dual-method use was/has NOT been practiced.

| Topic Focus                                        | Core questions                                                                      | Additional questions or prompts                                                                                                                                                                                                                                                                                                                                                                                                                                                                                                                                                                                                                                                                                  |
|----------------------------------------------------|-------------------------------------------------------------------------------------|------------------------------------------------------------------------------------------------------------------------------------------------------------------------------------------------------------------------------------------------------------------------------------------------------------------------------------------------------------------------------------------------------------------------------------------------------------------------------------------------------------------------------------------------------------------------------------------------------------------------------------------------------------------------------------------------------------------|
| <b>Reasons and motivations for dual-method use</b> | <p>Why do not you practice dual-method use with your spouse or live-in partner?</p> | <p>Why do not you use condoms with your spouse or live-in sexual partner even though you are using other forms of family planning methods?</p> <p>What are barriers/problems to using condoms with other family planning methods (dual-method use) with your spouse or live-in sexual partner?</p> <p>What kinds problems/challenges did/do you have?</p> <ul style="list-style-type: none"> <li>- In terms of access to family planning and condoms</li> <li>- In terms of communication with your partner</li> <li>- In terms of social stigma about condom use</li> <li>- In terms of side effects etc.</li> </ul> <p>Have these challenges been overcome? If yes, how did you overcome these challenges?</p> |

|                                                               |                                                                                                                                  |                                                                                                                                                                                                                                                                                                                                                                                                                                                                                                                                                                                                                                                                                                                        |
|---------------------------------------------------------------|----------------------------------------------------------------------------------------------------------------------------------|------------------------------------------------------------------------------------------------------------------------------------------------------------------------------------------------------------------------------------------------------------------------------------------------------------------------------------------------------------------------------------------------------------------------------------------------------------------------------------------------------------------------------------------------------------------------------------------------------------------------------------------------------------------------------------------------------------------------|
| <b>Negotiation and communication for condom use</b>           | <p>How do you communicate/negotiate with your partner about condom use?</p>                                                      | <p>Who decided to use family planning and why?</p> <p>When did you or/and your partner decide to use family planning?</p> <p>Have you ever discussed family planning with your partner, other family members, health workers etc.? If yes, how often do you discuss with them?</p> <p>Who normally decide to use condoms and why?</p> <p>Do you or your partner influence when they are/are not used?</p> <p>Have any risks been considered or discussed with your partner? What risks? How were they discussed?</p> <p>Do you find it easy to discuss the issue of protection with your partner? Who led the discussion?</p>                                                                                          |
| <b>Perceptions of condom use and contraception</b>            | <p>What do you think about using condoms with your partner?</p>                                                                  | <p>Have you ever used condoms with other family planning methods been like with your partner? When and why? What do you think about it?</p> <p>After you started using family planning methods, have you seen any changes in your perception about condom use?</p> <p>After you started using family planning methods, have you seen any changes in your partner's perception about condom use?</p> <p>Whose responsibility was/is protection about HIV/STIs? Why?</p> <p>Whose responsibility was/is protection about unintended pregnancies? Why?</p> <p>How do you feel about not using protection for HIV/STIs? How does your partner feel?</p> <p>Have any actions (been) taken when protection was not used?</p> |
| <b>Risk perceptions for unintended pregnancy and HIV/STIs</b> | <p>To what extent do you think about any risks involved with sex?</p> <p>What action do you take in relation to these risks?</p> | <p>Do you consider yourself to be at risk of pregnancy? Why? Why not?</p> <ul style="list-style-type: none"> <li>- Have you ever been pregnant? What happened? What did you do? How did you feel? How did other people react? Has it changed your behavior?</li> <li>- How would you feel if you found out you were pregnant? What would you do? Why?</li> </ul> <p>Do you consider yourself to be at risk of HIV/STIs? Why? Why not?</p>                                                                                                                                                                                                                                                                              |

|                                     |                                                                     |                                                                                                                                                                                                                                                                                                                                                                                                                                                                                                                                        |
|-------------------------------------|---------------------------------------------------------------------|----------------------------------------------------------------------------------------------------------------------------------------------------------------------------------------------------------------------------------------------------------------------------------------------------------------------------------------------------------------------------------------------------------------------------------------------------------------------------------------------------------------------------------------|
|                                     |                                                                     | <ul style="list-style-type: none"> <li>- Have you had a STI or symptom? Have your partner had a STI or symptom? What happened? What did you do? How did you feel? Has it changed your behavior?</li> <li>- Have you ever had an HIV test? Have any of your partners had an HIV test? Why? Why not?</li> <li>- Have you ever asked a partner to have a test? Why? Why not?</li> <li>- Have you ever had multiple sex partners? Have you ever been paid for sex? Do you use protection during these encounters? Why? Why not?</li> </ul> |
|                                     | Which forms of protection against pregnancy and STIs have you used? | Which family planning method have you used/do you use? Since when? Why? Where were/are the methods obtained from?                                                                                                                                                                                                                                                                                                                                                                                                                      |
|                                     |                                                                     | Have you used condoms throughout the years? Why? Why not?                                                                                                                                                                                                                                                                                                                                                                                                                                                                              |
|                                     |                                                                     | How do you decide when to use them?                                                                                                                                                                                                                                                                                                                                                                                                                                                                                                    |
|                                     | What, why, when and how was its use or non-use decided?             | Under what circumstances do you/ would you use them (if there was such a case)? Why? Reasons for engaging in protected sex?                                                                                                                                                                                                                                                                                                                                                                                                            |
| <b>Knowledge of dual-method use</b> | To what extent do you know about dual-method use?                   | <p>Who decided to use family planning and why?</p> <p>When did you or/and your partner decide to use family planning?</p> <p>Have you ever discussed family planning with your partner, other family members, health workers etc.? If yes, how often do you discuss with them?</p> <p>Who normally decide to use condoms and why?</p> <p>Have any risks been considered or discussed with your partner? What risks?</p> <p>Do you find it easy to discuss the issue of protection with your partner? Who led the discussion?</p>       |

|                     |  |
|---------------------|--|
| Interview end time: |  |
|---------------------|--|
