# Supplementary material for: Positive Deviance for Dual-Method Promotion among Women in Uganda: A Qualitative Study
Source: MDPI journal article supplement (doi:10.3390/ijerph17145009), 2020-07-12
Supplement: s1 [file s1]

**QUESTIONNAIRE (Phase I)****Introduction:**

“My name is... We are interviewing people in Mbarara district, Uganda about family planning methods and condom use. Have you been interviewed in the past few weeks for this study?”

*If the respondent has been interviewed before, do not interview this person again. Tell them you cannot interview them a second time, thank them, and end the interview. If she has not been interviewed before, explain the study using the information sheet.*

*If the respondent agrees to participate, ask her the following questions.*

**Screening question:**

- |                                                                                        |     |   |    |
|----------------------------------------------------------------------------------------|-----|---|----|
| 1. How old are you? <i>Check yes if she is between 18-49 years old.</i>                | Yes | • | No |
| 2. Do you have a husband or partner living together over 3 months?                     | Yes | • | No |
| 3. Have you had sexual intercourse with him in the past 3 months?                      | Yes | • | No |
| 4. Do you want to avoid pregnancies in the next 12 months?                             | Yes | • | No |
| 5. Are you using any family planning methods such as pills, implants, and injectables? | Yes | • | No |
| 6. Do you have a working telephone number?                                             | Yes | • | No |
| 7. Are you pregnant or infertile?                                                      | Yes | • | No |
| 8. Are you either a health worker, political or religious leader, or teacher?          | Yes | • | No |

*If the respondent answers yes to 1-6 and no to 7-8, she is eligible for this study, ask her to give the informed consent and start the interview.*

*If the respondent has proved not to be eligible for the study, tell her you cannot interview her, thank her, and end the interview.*

**Identification:**

|              |                                     |
|--------------|-------------------------------------|
| Date         | <u>DD</u> / <u>MM</u> / <u>YYYY</u> |
| Facility     |                                     |
| Interviewer  |                                     |
| Field editor |                                     |

## QUESTIONNAIRE

Date: DD/MM/YYYY  
 Facility: \_\_\_\_\_  
 Interviewer: \_\_\_\_\_  
 Field editor: \_\_\_\_\_

## A) BACKGROUND INFORMATION

|                            | Questions                                                                                                                                     | Responses                                                                                                                                                                                                                                                                                                                                                                                                                                                                                                                                                                                                                                                                                                                                                                                                                                                                                                                                                                                                                                                                                                                                                                                                                                                                                                                                                                                                                                                                                                                                                                                                                                                                                                                                                                                                                                                                                                                                                                                                                                                                                                                                                                                                                                                                                                                                                                                                                | Skin                     |    |     |                |                                       |                                       |            |                                       |                                       |                 |                                       |                                       |                   |                                       |                                       |                       |                                       |                                       |                   |                                       |                                       |                  |                                       |                                       |            |                                       |                                       |            |                                       |                                       |           |                                       |                                       |          |                                       |                                       |               |                                       |                                       |            |                                       |                                       |                     |                                       |                                       |                 |                                       |                                       |                            |                                       |                                       |                   |                                       |                                       |              |                                       |                                       |  |
|----------------------------|-----------------------------------------------------------------------------------------------------------------------------------------------|--------------------------------------------------------------------------------------------------------------------------------------------------------------------------------------------------------------------------------------------------------------------------------------------------------------------------------------------------------------------------------------------------------------------------------------------------------------------------------------------------------------------------------------------------------------------------------------------------------------------------------------------------------------------------------------------------------------------------------------------------------------------------------------------------------------------------------------------------------------------------------------------------------------------------------------------------------------------------------------------------------------------------------------------------------------------------------------------------------------------------------------------------------------------------------------------------------------------------------------------------------------------------------------------------------------------------------------------------------------------------------------------------------------------------------------------------------------------------------------------------------------------------------------------------------------------------------------------------------------------------------------------------------------------------------------------------------------------------------------------------------------------------------------------------------------------------------------------------------------------------------------------------------------------------------------------------------------------------------------------------------------------------------------------------------------------------------------------------------------------------------------------------------------------------------------------------------------------------------------------------------------------------------------------------------------------------------------------------------------------------------------------------------------------------|--------------------------|----|-----|----------------|---------------------------------------|---------------------------------------|------------|---------------------------------------|---------------------------------------|-----------------|---------------------------------------|---------------------------------------|-------------------|---------------------------------------|---------------------------------------|-----------------------|---------------------------------------|---------------------------------------|-------------------|---------------------------------------|---------------------------------------|------------------|---------------------------------------|---------------------------------------|------------|---------------------------------------|---------------------------------------|------------|---------------------------------------|---------------------------------------|-----------|---------------------------------------|---------------------------------------|----------|---------------------------------------|---------------------------------------|---------------|---------------------------------------|---------------------------------------|------------|---------------------------------------|---------------------------------------|---------------------|---------------------------------------|---------------------------------------|-----------------|---------------------------------------|---------------------------------------|----------------------------|---------------------------------------|---------------------------------------|-------------------|---------------------------------------|---------------------------------------|--------------|---------------------------------------|---------------------------------------|--|
| A-1                        | What is your purpose of visiting this health center today?                                                                                    | <input type="checkbox"/> <sub>0</sub> To initiate family planning<br><input type="checkbox"/> <sub>1</sub> To continue family planning<br><input type="checkbox"/> <sub>2</sub> To receive family planning counselling<br><input type="checkbox"/> <sub>3</sub> Other ( )                                                                                                                                                                                                                                                                                                                                                                                                                                                                                                                                                                                                                                                                                                                                                                                                                                                                                                                                                                                                                                                                                                                                                                                                                                                                                                                                                                                                                                                                                                                                                                                                                                                                                                                                                                                                                                                                                                                                                                                                                                                                                                                                                |                          |    |     |                |                                       |                                       |            |                                       |                                       |                 |                                       |                                       |                   |                                       |                                       |                       |                                       |                                       |                   |                                       |                                       |                  |                                       |                                       |            |                                       |                                       |            |                                       |                                       |           |                                       |                                       |          |                                       |                                       |               |                                       |                                       |            |                                       |                                       |                     |                                       |                                       |                 |                                       |                                       |                            |                                       |                                       |                   |                                       |                                       |              |                                       |                                       |  |
| A-2                        | How old are you? (Completed year)                                                                                                             | Age in completed years.....<br><input type="checkbox"/> <sub>8</sub> Don't know                                                                                                                                                                                                                                                                                                                                                                                                                                                                                                                                                                                                                                                                                                                                                                                                                                                                                                                                                                                                                                                                                                                                                                                                                                                                                                                                                                                                                                                                                                                                                                                                                                                                                                                                                                                                                                                                                                                                                                                                                                                                                                                                                                                                                                                                                                                                          |                          |    |     |                |                                       |                                       |            |                                       |                                       |                 |                                       |                                       |                   |                                       |                                       |                       |                                       |                                       |                   |                                       |                                       |                  |                                       |                                       |            |                                       |                                       |            |                                       |                                       |           |                                       |                                       |          |                                       |                                       |               |                                       |                                       |            |                                       |                                       |                     |                                       |                                       |                 |                                       |                                       |                            |                                       |                                       |                   |                                       |                                       |              |                                       |                                       |  |
| A-3                        | What is your ethnicity?                                                                                                                       | <input type="checkbox"/> <sub>1</sub> Banyankole<br><input type="checkbox"/> <sub>2</sub> Baganda<br><input type="checkbox"/> <sub>3</sub> Bakiga<br><input type="checkbox"/> <sub>4</sub> Batoro<br><input type="checkbox"/> <sub>5</sub> Acholi<br><input type="checkbox"/> <sub>6</sub> Other ( )                                                                                                                                                                                                                                                                                                                                                                                                                                                                                                                                                                                                                                                                                                                                                                                                                                                                                                                                                                                                                                                                                                                                                                                                                                                                                                                                                                                                                                                                                                                                                                                                                                                                                                                                                                                                                                                                                                                                                                                                                                                                                                                     |                          |    |     |                |                                       |                                       |            |                                       |                                       |                 |                                       |                                       |                   |                                       |                                       |                       |                                       |                                       |                   |                                       |                                       |                  |                                       |                                       |            |                                       |                                       |            |                                       |                                       |           |                                       |                                       |          |                                       |                                       |               |                                       |                                       |            |                                       |                                       |                     |                                       |                                       |                 |                                       |                                       |                            |                                       |                                       |                   |                                       |                                       |              |                                       |                                       |  |
| A-4                        | What is your religion?                                                                                                                        | <input type="checkbox"/> <sub>1</sub> Roman catholic<br><input type="checkbox"/> <sub>2</sub> Protestant/other Christian<br><input type="checkbox"/> <sub>3</sub> Muslim<br><input type="checkbox"/> <sub>4</sub> No religion<br><input type="checkbox"/> <sub>5</sub> Other ( )                                                                                                                                                                                                                                                                                                                                                                                                                                                                                                                                                                                                                                                                                                                                                                                                                                                                                                                                                                                                                                                                                                                                                                                                                                                                                                                                                                                                                                                                                                                                                                                                                                                                                                                                                                                                                                                                                                                                                                                                                                                                                                                                         |                          |    |     |                |                                       |                                       |            |                                       |                                       |                 |                                       |                                       |                   |                                       |                                       |                       |                                       |                                       |                   |                                       |                                       |                  |                                       |                                       |            |                                       |                                       |            |                                       |                                       |           |                                       |                                       |          |                                       |                                       |               |                                       |                                       |            |                                       |                                       |                     |                                       |                                       |                 |                                       |                                       |                            |                                       |                                       |                   |                                       |                                       |              |                                       |                                       |  |
| A-5                        | What is the highest level of school you have attended?                                                                                        | <input type="checkbox"/> <sub>0</sub> Never<br><input type="checkbox"/> <sub>1</sub> Incomplete primary school<br><input type="checkbox"/> <sub>2</sub> Complete primary school<br><input type="checkbox"/> <sub>3</sub> Incomplete secondary school<br><input type="checkbox"/> <sub>4</sub> Complete secondary school<br><input type="checkbox"/> <sub>5</sub> Higher than secondary school                                                                                                                                                                                                                                                                                                                                                                                                                                                                                                                                                                                                                                                                                                                                                                                                                                                                                                                                                                                                                                                                                                                                                                                                                                                                                                                                                                                                                                                                                                                                                                                                                                                                                                                                                                                                                                                                                                                                                                                                                            |                          |    |     |                |                                       |                                       |            |                                       |                                       |                 |                                       |                                       |                   |                                       |                                       |                       |                                       |                                       |                   |                                       |                                       |                  |                                       |                                       |            |                                       |                                       |            |                                       |                                       |           |                                       |                                       |          |                                       |                                       |               |                                       |                                       |            |                                       |                                       |                     |                                       |                                       |                 |                                       |                                       |                            |                                       |                                       |                   |                                       |                                       |              |                                       |                                       |  |
| A-6                        | What is your occupation?                                                                                                                      | <input type="checkbox"/> <sub>0</sub> Unemployed<br><input type="checkbox"/> <sub>1</sub> Agriculture<br><input type="checkbox"/> <sub>2</sub> Government worker<br><input type="checkbox"/> <sub>3</sub> Private sector<br><input type="checkbox"/> <sub>4</sub> Own business<br><input type="checkbox"/> <sub>5</sub> Students<br><input type="checkbox"/> <sub>6</sub> Other ( )                                                                                                                                                                                                                                                                                                                                                                                                                                                                                                                                                                                                                                                                                                                                                                                                                                                                                                                                                                                                                                                                                                                                                                                                                                                                                                                                                                                                                                                                                                                                                                                                                                                                                                                                                                                                                                                                                                                                                                                                                                      |                          |    |     |                |                                       |                                       |            |                                       |                                       |                 |                                       |                                       |                   |                                       |                                       |                       |                                       |                                       |                   |                                       |                                       |                  |                                       |                                       |            |                                       |                                       |            |                                       |                                       |           |                                       |                                       |          |                                       |                                       |               |                                       |                                       |            |                                       |                                       |                     |                                       |                                       |                 |                                       |                                       |                            |                                       |                                       |                   |                                       |                                       |              |                                       |                                       |  |
| A-7                        | Does your household have:                                                                                                                     | <table border="1"> <thead> <tr> <th></th> <th>NO</th> <th>YES</th> </tr> </thead> <tbody> <tr><td>a) Electricity</td><td><input type="checkbox"/><sub>0</sub></td><td><input type="checkbox"/><sub>1</sub></td></tr> <tr><td>b) A radio</td><td><input type="checkbox"/><sub>0</sub></td><td><input type="checkbox"/><sub>1</sub></td></tr> <tr><td>c) A television</td><td><input type="checkbox"/><sub>0</sub></td><td><input type="checkbox"/><sub>1</sub></td></tr> <tr><td>d) A mobile phone</td><td><input type="checkbox"/><sub>0</sub></td><td><input type="checkbox"/><sub>1</sub></td></tr> <tr><td>e) A non-mobile phone</td><td><input type="checkbox"/><sub>0</sub></td><td><input type="checkbox"/><sub>1</sub></td></tr> <tr><td>f) A refrigerator</td><td><input type="checkbox"/><sub>0</sub></td><td><input type="checkbox"/><sub>1</sub></td></tr> <tr><td>g) A solar panel</td><td><input type="checkbox"/><sub>0</sub></td><td><input type="checkbox"/><sub>1</sub></td></tr> <tr><td>h) A table</td><td><input type="checkbox"/><sub>0</sub></td><td><input type="checkbox"/><sub>1</sub></td></tr> <tr><td>i) A chair</td><td><input type="checkbox"/><sub>0</sub></td><td><input type="checkbox"/><sub>1</sub></td></tr> <tr><td>j) A sofa</td><td><input type="checkbox"/><sub>0</sub></td><td><input type="checkbox"/><sub>1</sub></td></tr> <tr><td>k) A bed</td><td><input type="checkbox"/><sub>0</sub></td><td><input type="checkbox"/><sub>1</sub></td></tr> <tr><td>l) A cupboard</td><td><input type="checkbox"/><sub>0</sub></td><td><input type="checkbox"/><sub>1</sub></td></tr> <tr><td>m) A clock</td><td><input type="checkbox"/><sub>0</sub></td><td><input type="checkbox"/><sub>1</sub></td></tr> <tr><td>n) A microwave oven</td><td><input type="checkbox"/><sub>0</sub></td><td><input type="checkbox"/><sub>1</sub></td></tr> <tr><td>o) A DVD player</td><td><input type="checkbox"/><sub>0</sub></td><td><input type="checkbox"/><sub>1</sub></td></tr> <tr><td>p) A cassette or CD player</td><td><input type="checkbox"/><sub>0</sub></td><td><input type="checkbox"/><sub>1</sub></td></tr> <tr><td>q) A car or truck</td><td><input type="checkbox"/><sub>0</sub></td><td><input type="checkbox"/><sub>1</sub></td></tr> <tr><td>r) A bicycle</td><td><input type="checkbox"/><sub>0</sub></td><td><input type="checkbox"/><sub>1</sub></td></tr> </tbody> </table> |                          | NO | YES | a) Electricity | <input type="checkbox"/> <sub>0</sub> | <input type="checkbox"/> <sub>1</sub> | b) A radio | <input type="checkbox"/> <sub>0</sub> | <input type="checkbox"/> <sub>1</sub> | c) A television | <input type="checkbox"/> <sub>0</sub> | <input type="checkbox"/> <sub>1</sub> | d) A mobile phone | <input type="checkbox"/> <sub>0</sub> | <input type="checkbox"/> <sub>1</sub> | e) A non-mobile phone | <input type="checkbox"/> <sub>0</sub> | <input type="checkbox"/> <sub>1</sub> | f) A refrigerator | <input type="checkbox"/> <sub>0</sub> | <input type="checkbox"/> <sub>1</sub> | g) A solar panel | <input type="checkbox"/> <sub>0</sub> | <input type="checkbox"/> <sub>1</sub> | h) A table | <input type="checkbox"/> <sub>0</sub> | <input type="checkbox"/> <sub>1</sub> | i) A chair | <input type="checkbox"/> <sub>0</sub> | <input type="checkbox"/> <sub>1</sub> | j) A sofa | <input type="checkbox"/> <sub>0</sub> | <input type="checkbox"/> <sub>1</sub> | k) A bed | <input type="checkbox"/> <sub>0</sub> | <input type="checkbox"/> <sub>1</sub> | l) A cupboard | <input type="checkbox"/> <sub>0</sub> | <input type="checkbox"/> <sub>1</sub> | m) A clock | <input type="checkbox"/> <sub>0</sub> | <input type="checkbox"/> <sub>1</sub> | n) A microwave oven | <input type="checkbox"/> <sub>0</sub> | <input type="checkbox"/> <sub>1</sub> | o) A DVD player | <input type="checkbox"/> <sub>0</sub> | <input type="checkbox"/> <sub>1</sub> | p) A cassette or CD player | <input type="checkbox"/> <sub>0</sub> | <input type="checkbox"/> <sub>1</sub> | q) A car or truck | <input type="checkbox"/> <sub>0</sub> | <input type="checkbox"/> <sub>1</sub> | r) A bicycle | <input type="checkbox"/> <sub>0</sub> | <input type="checkbox"/> <sub>1</sub> |  |
|                            | NO                                                                                                                                            | YES                                                                                                                                                                                                                                                                                                                                                                                                                                                                                                                                                                                                                                                                                                                                                                                                                                                                                                                                                                                                                                                                                                                                                                                                                                                                                                                                                                                                                                                                                                                                                                                                                                                                                                                                                                                                                                                                                                                                                                                                                                                                                                                                                                                                                                                                                                                                                                                                                      |                          |    |     |                |                                       |                                       |            |                                       |                                       |                 |                                       |                                       |                   |                                       |                                       |                       |                                       |                                       |                   |                                       |                                       |                  |                                       |                                       |            |                                       |                                       |            |                                       |                                       |           |                                       |                                       |          |                                       |                                       |               |                                       |                                       |            |                                       |                                       |                     |                                       |                                       |                 |                                       |                                       |                            |                                       |                                       |                   |                                       |                                       |              |                                       |                                       |  |
| a) Electricity             | <input type="checkbox"/> <sub>0</sub>                                                                                                         | <input type="checkbox"/> <sub>1</sub>                                                                                                                                                                                                                                                                                                                                                                                                                                                                                                                                                                                                                                                                                                                                                                                                                                                                                                                                                                                                                                                                                                                                                                                                                                                                                                                                                                                                                                                                                                                                                                                                                                                                                                                                                                                                                                                                                                                                                                                                                                                                                                                                                                                                                                                                                                                                                                                    |                          |    |     |                |                                       |                                       |            |                                       |                                       |                 |                                       |                                       |                   |                                       |                                       |                       |                                       |                                       |                   |                                       |                                       |                  |                                       |                                       |            |                                       |                                       |            |                                       |                                       |           |                                       |                                       |          |                                       |                                       |               |                                       |                                       |            |                                       |                                       |                     |                                       |                                       |                 |                                       |                                       |                            |                                       |                                       |                   |                                       |                                       |              |                                       |                                       |  |
| b) A radio                 | <input type="checkbox"/> <sub>0</sub>                                                                                                         | <input type="checkbox"/> <sub>1</sub>                                                                                                                                                                                                                                                                                                                                                                                                                                                                                                                                                                                                                                                                                                                                                                                                                                                                                                                                                                                                                                                                                                                                                                                                                                                                                                                                                                                                                                                                                                                                                                                                                                                                                                                                                                                                                                                                                                                                                                                                                                                                                                                                                                                                                                                                                                                                                                                    |                          |    |     |                |                                       |                                       |            |                                       |                                       |                 |                                       |                                       |                   |                                       |                                       |                       |                                       |                                       |                   |                                       |                                       |                  |                                       |                                       |            |                                       |                                       |            |                                       |                                       |           |                                       |                                       |          |                                       |                                       |               |                                       |                                       |            |                                       |                                       |                     |                                       |                                       |                 |                                       |                                       |                            |                                       |                                       |                   |                                       |                                       |              |                                       |                                       |  |
| c) A television            | <input type="checkbox"/> <sub>0</sub>                                                                                                         | <input type="checkbox"/> <sub>1</sub>                                                                                                                                                                                                                                                                                                                                                                                                                                                                                                                                                                                                                                                                                                                                                                                                                                                                                                                                                                                                                                                                                                                                                                                                                                                                                                                                                                                                                                                                                                                                                                                                                                                                                                                                                                                                                                                                                                                                                                                                                                                                                                                                                                                                                                                                                                                                                                                    |                          |    |     |                |                                       |                                       |            |                                       |                                       |                 |                                       |                                       |                   |                                       |                                       |                       |                                       |                                       |                   |                                       |                                       |                  |                                       |                                       |            |                                       |                                       |            |                                       |                                       |           |                                       |                                       |          |                                       |                                       |               |                                       |                                       |            |                                       |                                       |                     |                                       |                                       |                 |                                       |                                       |                            |                                       |                                       |                   |                                       |                                       |              |                                       |                                       |  |
| d) A mobile phone          | <input type="checkbox"/> <sub>0</sub>                                                                                                         | <input type="checkbox"/> <sub>1</sub>                                                                                                                                                                                                                                                                                                                                                                                                                                                                                                                                                                                                                                                                                                                                                                                                                                                                                                                                                                                                                                                                                                                                                                                                                                                                                                                                                                                                                                                                                                                                                                                                                                                                                                                                                                                                                                                                                                                                                                                                                                                                                                                                                                                                                                                                                                                                                                                    |                          |    |     |                |                                       |                                       |            |                                       |                                       |                 |                                       |                                       |                   |                                       |                                       |                       |                                       |                                       |                   |                                       |                                       |                  |                                       |                                       |            |                                       |                                       |            |                                       |                                       |           |                                       |                                       |          |                                       |                                       |               |                                       |                                       |            |                                       |                                       |                     |                                       |                                       |                 |                                       |                                       |                            |                                       |                                       |                   |                                       |                                       |              |                                       |                                       |  |
| e) A non-mobile phone      | <input type="checkbox"/> <sub>0</sub>                                                                                                         | <input type="checkbox"/> <sub>1</sub>                                                                                                                                                                                                                                                                                                                                                                                                                                                                                                                                                                                                                                                                                                                                                                                                                                                                                                                                                                                                                                                                                                                                                                                                                                                                                                                                                                                                                                                                                                                                                                                                                                                                                                                                                                                                                                                                                                                                                                                                                                                                                                                                                                                                                                                                                                                                                                                    |                          |    |     |                |                                       |                                       |            |                                       |                                       |                 |                                       |                                       |                   |                                       |                                       |                       |                                       |                                       |                   |                                       |                                       |                  |                                       |                                       |            |                                       |                                       |            |                                       |                                       |           |                                       |                                       |          |                                       |                                       |               |                                       |                                       |            |                                       |                                       |                     |                                       |                                       |                 |                                       |                                       |                            |                                       |                                       |                   |                                       |                                       |              |                                       |                                       |  |
| f) A refrigerator          | <input type="checkbox"/> <sub>0</sub>                                                                                                         | <input type="checkbox"/> <sub>1</sub>                                                                                                                                                                                                                                                                                                                                                                                                                                                                                                                                                                                                                                                                                                                                                                                                                                                                                                                                                                                                                                                                                                                                                                                                                                                                                                                                                                                                                                                                                                                                                                                                                                                                                                                                                                                                                                                                                                                                                                                                                                                                                                                                                                                                                                                                                                                                                                                    |                          |    |     |                |                                       |                                       |            |                                       |                                       |                 |                                       |                                       |                   |                                       |                                       |                       |                                       |                                       |                   |                                       |                                       |                  |                                       |                                       |            |                                       |                                       |            |                                       |                                       |           |                                       |                                       |          |                                       |                                       |               |                                       |                                       |            |                                       |                                       |                     |                                       |                                       |                 |                                       |                                       |                            |                                       |                                       |                   |                                       |                                       |              |                                       |                                       |  |
| g) A solar panel           | <input type="checkbox"/> <sub>0</sub>                                                                                                         | <input type="checkbox"/> <sub>1</sub>                                                                                                                                                                                                                                                                                                                                                                                                                                                                                                                                                                                                                                                                                                                                                                                                                                                                                                                                                                                                                                                                                                                                                                                                                                                                                                                                                                                                                                                                                                                                                                                                                                                                                                                                                                                                                                                                                                                                                                                                                                                                                                                                                                                                                                                                                                                                                                                    |                          |    |     |                |                                       |                                       |            |                                       |                                       |                 |                                       |                                       |                   |                                       |                                       |                       |                                       |                                       |                   |                                       |                                       |                  |                                       |                                       |            |                                       |                                       |            |                                       |                                       |           |                                       |                                       |          |                                       |                                       |               |                                       |                                       |            |                                       |                                       |                     |                                       |                                       |                 |                                       |                                       |                            |                                       |                                       |                   |                                       |                                       |              |                                       |                                       |  |
| h) A table                 | <input type="checkbox"/> <sub>0</sub>                                                                                                         | <input type="checkbox"/> <sub>1</sub>                                                                                                                                                                                                                                                                                                                                                                                                                                                                                                                                                                                                                                                                                                                                                                                                                                                                                                                                                                                                                                                                                                                                                                                                                                                                                                                                                                                                                                                                                                                                                                                                                                                                                                                                                                                                                                                                                                                                                                                                                                                                                                                                                                                                                                                                                                                                                                                    |                          |    |     |                |                                       |                                       |            |                                       |                                       |                 |                                       |                                       |                   |                                       |                                       |                       |                                       |                                       |                   |                                       |                                       |                  |                                       |                                       |            |                                       |                                       |            |                                       |                                       |           |                                       |                                       |          |                                       |                                       |               |                                       |                                       |            |                                       |                                       |                     |                                       |                                       |                 |                                       |                                       |                            |                                       |                                       |                   |                                       |                                       |              |                                       |                                       |  |
| i) A chair                 | <input type="checkbox"/> <sub>0</sub>                                                                                                         | <input type="checkbox"/> <sub>1</sub>                                                                                                                                                                                                                                                                                                                                                                                                                                                                                                                                                                                                                                                                                                                                                                                                                                                                                                                                                                                                                                                                                                                                                                                                                                                                                                                                                                                                                                                                                                                                                                                                                                                                                                                                                                                                                                                                                                                                                                                                                                                                                                                                                                                                                                                                                                                                                                                    |                          |    |     |                |                                       |                                       |            |                                       |                                       |                 |                                       |                                       |                   |                                       |                                       |                       |                                       |                                       |                   |                                       |                                       |                  |                                       |                                       |            |                                       |                                       |            |                                       |                                       |           |                                       |                                       |          |                                       |                                       |               |                                       |                                       |            |                                       |                                       |                     |                                       |                                       |                 |                                       |                                       |                            |                                       |                                       |                   |                                       |                                       |              |                                       |                                       |  |
| j) A sofa                  | <input type="checkbox"/> <sub>0</sub>                                                                                                         | <input type="checkbox"/> <sub>1</sub>                                                                                                                                                                                                                                                                                                                                                                                                                                                                                                                                                                                                                                                                                                                                                                                                                                                                                                                                                                                                                                                                                                                                                                                                                                                                                                                                                                                                                                                                                                                                                                                                                                                                                                                                                                                                                                                                                                                                                                                                                                                                                                                                                                                                                                                                                                                                                                                    |                          |    |     |                |                                       |                                       |            |                                       |                                       |                 |                                       |                                       |                   |                                       |                                       |                       |                                       |                                       |                   |                                       |                                       |                  |                                       |                                       |            |                                       |                                       |            |                                       |                                       |           |                                       |                                       |          |                                       |                                       |               |                                       |                                       |            |                                       |                                       |                     |                                       |                                       |                 |                                       |                                       |                            |                                       |                                       |                   |                                       |                                       |              |                                       |                                       |  |
| k) A bed                   | <input type="checkbox"/> <sub>0</sub>                                                                                                         | <input type="checkbox"/> <sub>1</sub>                                                                                                                                                                                                                                                                                                                                                                                                                                                                                                                                                                                                                                                                                                                                                                                                                                                                                                                                                                                                                                                                                                                                                                                                                                                                                                                                                                                                                                                                                                                                                                                                                                                                                                                                                                                                                                                                                                                                                                                                                                                                                                                                                                                                                                                                                                                                                                                    |                          |    |     |                |                                       |                                       |            |                                       |                                       |                 |                                       |                                       |                   |                                       |                                       |                       |                                       |                                       |                   |                                       |                                       |                  |                                       |                                       |            |                                       |                                       |            |                                       |                                       |           |                                       |                                       |          |                                       |                                       |               |                                       |                                       |            |                                       |                                       |                     |                                       |                                       |                 |                                       |                                       |                            |                                       |                                       |                   |                                       |                                       |              |                                       |                                       |  |
| l) A cupboard              | <input type="checkbox"/> <sub>0</sub>                                                                                                         | <input type="checkbox"/> <sub>1</sub>                                                                                                                                                                                                                                                                                                                                                                                                                                                                                                                                                                                                                                                                                                                                                                                                                                                                                                                                                                                                                                                                                                                                                                                                                                                                                                                                                                                                                                                                                                                                                                                                                                                                                                                                                                                                                                                                                                                                                                                                                                                                                                                                                                                                                                                                                                                                                                                    |                          |    |     |                |                                       |                                       |            |                                       |                                       |                 |                                       |                                       |                   |                                       |                                       |                       |                                       |                                       |                   |                                       |                                       |                  |                                       |                                       |            |                                       |                                       |            |                                       |                                       |           |                                       |                                       |          |                                       |                                       |               |                                       |                                       |            |                                       |                                       |                     |                                       |                                       |                 |                                       |                                       |                            |                                       |                                       |                   |                                       |                                       |              |                                       |                                       |  |
| m) A clock                 | <input type="checkbox"/> <sub>0</sub>                                                                                                         | <input type="checkbox"/> <sub>1</sub>                                                                                                                                                                                                                                                                                                                                                                                                                                                                                                                                                                                                                                                                                                                                                                                                                                                                                                                                                                                                                                                                                                                                                                                                                                                                                                                                                                                                                                                                                                                                                                                                                                                                                                                                                                                                                                                                                                                                                                                                                                                                                                                                                                                                                                                                                                                                                                                    |                          |    |     |                |                                       |                                       |            |                                       |                                       |                 |                                       |                                       |                   |                                       |                                       |                       |                                       |                                       |                   |                                       |                                       |                  |                                       |                                       |            |                                       |                                       |            |                                       |                                       |           |                                       |                                       |          |                                       |                                       |               |                                       |                                       |            |                                       |                                       |                     |                                       |                                       |                 |                                       |                                       |                            |                                       |                                       |                   |                                       |                                       |              |                                       |                                       |  |
| n) A microwave oven        | <input type="checkbox"/> <sub>0</sub>                                                                                                         | <input type="checkbox"/> <sub>1</sub>                                                                                                                                                                                                                                                                                                                                                                                                                                                                                                                                                                                                                                                                                                                                                                                                                                                                                                                                                                                                                                                                                                                                                                                                                                                                                                                                                                                                                                                                                                                                                                                                                                                                                                                                                                                                                                                                                                                                                                                                                                                                                                                                                                                                                                                                                                                                                                                    |                          |    |     |                |                                       |                                       |            |                                       |                                       |                 |                                       |                                       |                   |                                       |                                       |                       |                                       |                                       |                   |                                       |                                       |                  |                                       |                                       |            |                                       |                                       |            |                                       |                                       |           |                                       |                                       |          |                                       |                                       |               |                                       |                                       |            |                                       |                                       |                     |                                       |                                       |                 |                                       |                                       |                            |                                       |                                       |                   |                                       |                                       |              |                                       |                                       |  |
| o) A DVD player            | <input type="checkbox"/> <sub>0</sub>                                                                                                         | <input type="checkbox"/> <sub>1</sub>                                                                                                                                                                                                                                                                                                                                                                                                                                                                                                                                                                                                                                                                                                                                                                                                                                                                                                                                                                                                                                                                                                                                                                                                                                                                                                                                                                                                                                                                                                                                                                                                                                                                                                                                                                                                                                                                                                                                                                                                                                                                                                                                                                                                                                                                                                                                                                                    |                          |    |     |                |                                       |                                       |            |                                       |                                       |                 |                                       |                                       |                   |                                       |                                       |                       |                                       |                                       |                   |                                       |                                       |                  |                                       |                                       |            |                                       |                                       |            |                                       |                                       |           |                                       |                                       |          |                                       |                                       |               |                                       |                                       |            |                                       |                                       |                     |                                       |                                       |                 |                                       |                                       |                            |                                       |                                       |                   |                                       |                                       |              |                                       |                                       |  |
| p) A cassette or CD player | <input type="checkbox"/> <sub>0</sub>                                                                                                         | <input type="checkbox"/> <sub>1</sub>                                                                                                                                                                                                                                                                                                                                                                                                                                                                                                                                                                                                                                                                                                                                                                                                                                                                                                                                                                                                                                                                                                                                                                                                                                                                                                                                                                                                                                                                                                                                                                                                                                                                                                                                                                                                                                                                                                                                                                                                                                                                                                                                                                                                                                                                                                                                                                                    |                          |    |     |                |                                       |                                       |            |                                       |                                       |                 |                                       |                                       |                   |                                       |                                       |                       |                                       |                                       |                   |                                       |                                       |                  |                                       |                                       |            |                                       |                                       |            |                                       |                                       |           |                                       |                                       |          |                                       |                                       |               |                                       |                                       |            |                                       |                                       |                     |                                       |                                       |                 |                                       |                                       |                            |                                       |                                       |                   |                                       |                                       |              |                                       |                                       |  |
| q) A car or truck          | <input type="checkbox"/> <sub>0</sub>                                                                                                         | <input type="checkbox"/> <sub>1</sub>                                                                                                                                                                                                                                                                                                                                                                                                                                                                                                                                                                                                                                                                                                                                                                                                                                                                                                                                                                                                                                                                                                                                                                                                                                                                                                                                                                                                                                                                                                                                                                                                                                                                                                                                                                                                                                                                                                                                                                                                                                                                                                                                                                                                                                                                                                                                                                                    |                          |    |     |                |                                       |                                       |            |                                       |                                       |                 |                                       |                                       |                   |                                       |                                       |                       |                                       |                                       |                   |                                       |                                       |                  |                                       |                                       |            |                                       |                                       |            |                                       |                                       |           |                                       |                                       |          |                                       |                                       |               |                                       |                                       |            |                                       |                                       |                     |                                       |                                       |                 |                                       |                                       |                            |                                       |                                       |                   |                                       |                                       |              |                                       |                                       |  |
| r) A bicycle               | <input type="checkbox"/> <sub>0</sub>                                                                                                         | <input type="checkbox"/> <sub>1</sub>                                                                                                                                                                                                                                                                                                                                                                                                                                                                                                                                                                                                                                                                                                                                                                                                                                                                                                                                                                                                                                                                                                                                                                                                                                                                                                                                                                                                                                                                                                                                                                                                                                                                                                                                                                                                                                                                                                                                                                                                                                                                                                                                                                                                                                                                                                                                                                                    |                          |    |     |                |                                       |                                       |            |                                       |                                       |                 |                                       |                                       |                   |                                       |                                       |                       |                                       |                                       |                   |                                       |                                       |                  |                                       |                                       |            |                                       |                                       |            |                                       |                                       |           |                                       |                                       |          |                                       |                                       |               |                                       |                                       |            |                                       |                                       |                     |                                       |                                       |                 |                                       |                                       |                            |                                       |                                       |                   |                                       |                                       |              |                                       |                                       |  |
| A-8                        | What is your marital status?                                                                                                                  | <input type="checkbox"/> <sub>1</sub> Single<br><input type="checkbox"/> <sub>2</sub> Married<br><input type="checkbox"/> <sub>3</sub> Cohabiting<br><input type="checkbox"/> <sub>4</sub> Widow<br><input type="checkbox"/> <sub>5</sub> Divorced                                                                                                                                                                                                                                                                                                                                                                                                                                                                                                                                                                                                                                                                                                                                                                                                                                                                                                                                                                                                                                                                                                                                                                                                                                                                                                                                                                                                                                                                                                                                                                                                                                                                                                                                                                                                                                                                                                                                                                                                                                                                                                                                                                       |                          |    |     |                |                                       |                                       |            |                                       |                                       |                 |                                       |                                       |                   |                                       |                                       |                       |                                       |                                       |                   |                                       |                                       |                  |                                       |                                       |            |                                       |                                       |            |                                       |                                       |           |                                       |                                       |          |                                       |                                       |               |                                       |                                       |            |                                       |                                       |                     |                                       |                                       |                 |                                       |                                       |                            |                                       |                                       |                   |                                       |                                       |              |                                       |                                       |  |
| A-9                        | Are you currently married or living with a man with whom you have a sexual relationship?                                                      | <input type="checkbox"/> <sub>1</sub> Currently married, living with a spouse<br><input type="checkbox"/> <sub>2</sub> Currently married, living with another sexual partner<br><input type="checkbox"/> <sub>3</sub> Currently married, not living with a spouse or any other sexual partners<br><input type="checkbox"/> <sub>4</sub> Not married, living with a sexual partner<br><input type="checkbox"/> <sub>5</sub> Not married, not living with a sexual partner                                                                                                                                                                                                                                                                                                                                                                                                                                                                                                                                                                                                                                                                                                                                                                                                                                                                                                                                                                                                                                                                                                                                                                                                                                                                                                                                                                                                                                                                                                                                                                                                                                                                                                                                                                                                                                                                                                                                                 | →A-11<br>→Check Criteria |    |     |                |                                       |                                       |            |                                       |                                       |                 |                                       |                                       |                   |                                       |                                       |                       |                                       |                                       |                   |                                       |                                       |                  |                                       |                                       |            |                                       |                                       |            |                                       |                                       |           |                                       |                                       |          |                                       |                                       |               |                                       |                                       |            |                                       |                                       |                     |                                       |                                       |                 |                                       |                                       |                            |                                       |                                       |                   |                                       |                                       |              |                                       |                                       |  |
| A-10                       | Does your husband have other wives?                                                                                                           | <input type="checkbox"/> <sub>0</sub> No<br><input type="checkbox"/> <sub>1</sub> Yes<br><input type="checkbox"/> <sub>8</sub> Don't know                                                                                                                                                                                                                                                                                                                                                                                                                                                                                                                                                                                                                                                                                                                                                                                                                                                                                                                                                                                                                                                                                                                                                                                                                                                                                                                                                                                                                                                                                                                                                                                                                                                                                                                                                                                                                                                                                                                                                                                                                                                                                                                                                                                                                                                                                |                          |    |     |                |                                       |                                       |            |                                       |                                       |                 |                                       |                                       |                   |                                       |                                       |                       |                                       |                                       |                   |                                       |                                       |                  |                                       |                                       |            |                                       |                                       |            |                                       |                                       |           |                                       |                                       |          |                                       |                                       |               |                                       |                                       |            |                                       |                                       |                     |                                       |                                       |                 |                                       |                                       |                            |                                       |                                       |                   |                                       |                                       |              |                                       |                                       |  |
| A-11                       | Have you ever given birth?                                                                                                                    | <input type="checkbox"/> <sub>0</sub> No<br><input type="checkbox"/> <sub>1</sub> Yes                                                                                                                                                                                                                                                                                                                                                                                                                                                                                                                                                                                                                                                                                                                                                                                                                                                                                                                                                                                                                                                                                                                                                                                                                                                                                                                                                                                                                                                                                                                                                                                                                                                                                                                                                                                                                                                                                                                                                                                                                                                                                                                                                                                                                                                                                                                                    | →A-15                    |    |     |                |                                       |                                       |            |                                       |                                       |                 |                                       |                                       |                   |                                       |                                       |                       |                                       |                                       |                   |                                       |                                       |                  |                                       |                                       |            |                                       |                                       |            |                                       |                                       |           |                                       |                                       |          |                                       |                                       |               |                                       |                                       |            |                                       |                                       |                     |                                       |                                       |                 |                                       |                                       |                            |                                       |                                       |                   |                                       |                                       |              |                                       |                                       |  |
| A-12                       | Have you ever had an unintended pregnancy?                                                                                                    | <input type="checkbox"/> <sub>0</sub> No<br><input type="checkbox"/> <sub>1</sub> Yes                                                                                                                                                                                                                                                                                                                                                                                                                                                                                                                                                                                                                                                                                                                                                                                                                                                                                                                                                                                                                                                                                                                                                                                                                                                                                                                                                                                                                                                                                                                                                                                                                                                                                                                                                                                                                                                                                                                                                                                                                                                                                                                                                                                                                                                                                                                                    |                          |    |     |                |                                       |                                       |            |                                       |                                       |                 |                                       |                                       |                   |                                       |                                       |                       |                                       |                                       |                   |                                       |                                       |                  |                                       |                                       |            |                                       |                                       |            |                                       |                                       |           |                                       |                                       |          |                                       |                                       |               |                                       |                                       |            |                                       |                                       |                     |                                       |                                       |                 |                                       |                                       |                            |                                       |                                       |                   |                                       |                                       |              |                                       |                                       |  |
| A-13                       | How many children have you ever delivered?<br>IF NONE, RECORD '00'.                                                                           | ..... □□                                                                                                                                                                                                                                                                                                                                                                                                                                                                                                                                                                                                                                                                                                                                                                                                                                                                                                                                                                                                                                                                                                                                                                                                                                                                                                                                                                                                                                                                                                                                                                                                                                                                                                                                                                                                                                                                                                                                                                                                                                                                                                                                                                                                                                                                                                                                                                                                                 |                          |    |     |                |                                       |                                       |            |                                       |                                       |                 |                                       |                                       |                   |                                       |                                       |                       |                                       |                                       |                   |                                       |                                       |                  |                                       |                                       |            |                                       |                                       |            |                                       |                                       |           |                                       |                                       |          |                                       |                                       |               |                                       |                                       |            |                                       |                                       |                     |                                       |                                       |                 |                                       |                                       |                            |                                       |                                       |                   |                                       |                                       |              |                                       |                                       |  |
| A-14                       | How many living children do you have?<br>IF NONE, RECORD '00'.                                                                                | ..... □□                                                                                                                                                                                                                                                                                                                                                                                                                                                                                                                                                                                                                                                                                                                                                                                                                                                                                                                                                                                                                                                                                                                                                                                                                                                                                                                                                                                                                                                                                                                                                                                                                                                                                                                                                                                                                                                                                                                                                                                                                                                                                                                                                                                                                                                                                                                                                                                                                 |                          |    |     |                |                                       |                                       |            |                                       |                                       |                 |                                       |                                       |                   |                                       |                                       |                       |                                       |                                       |                   |                                       |                                       |                  |                                       |                                       |            |                                       |                                       |            |                                       |                                       |           |                                       |                                       |          |                                       |                                       |               |                                       |                                       |            |                                       |                                       |                     |                                       |                                       |                 |                                       |                                       |                            |                                       |                                       |                   |                                       |                                       |              |                                       |                                       |  |
| A-15                       | Would you like to have (a/another) child in the future, or would you prefer not to have any (more) children?                                  | <input type="checkbox"/> <sub>0</sub> No more<br><input type="checkbox"/> <sub>1</sub> Have (a/another) child<br><input type="checkbox"/> <sub>2</sub> Undecided                                                                                                                                                                                                                                                                                                                                                                                                                                                                                                                                                                                                                                                                                                                                                                                                                                                                                                                                                                                                                                                                                                                                                                                                                                                                                                                                                                                                                                                                                                                                                                                                                                                                                                                                                                                                                                                                                                                                                                                                                                                                                                                                                                                                                                                         |                          |    |     |                |                                       |                                       |            |                                       |                                       |                 |                                       |                                       |                   |                                       |                                       |                       |                                       |                                       |                   |                                       |                                       |                  |                                       |                                       |            |                                       |                                       |            |                                       |                                       |           |                                       |                                       |          |                                       |                                       |               |                                       |                                       |            |                                       |                                       |                     |                                       |                                       |                 |                                       |                                       |                            |                                       |                                       |                   |                                       |                                       |              |                                       |                                       |  |
| A-16                       | Would your husband / live-in sexual partner like to have (a/another) child in the future, or would he prefer not to have any (more) children? | <input type="checkbox"/> <sub>0</sub> No more<br><input type="checkbox"/> <sub>1</sub> Have (a/another) child<br><input type="checkbox"/> <sub>2</sub> Undecided<br><input type="checkbox"/> <sub>8</sub> Don't know                                                                                                                                                                                                                                                                                                                                                                                                                                                                                                                                                                                                                                                                                                                                                                                                                                                                                                                                                                                                                                                                                                                                                                                                                                                                                                                                                                                                                                                                                                                                                                                                                                                                                                                                                                                                                                                                                                                                                                                                                                                                                                                                                                                                     |                          |    |     |                |                                       |                                       |            |                                       |                                       |                 |                                       |                                       |                   |                                       |                                       |                       |                                       |                                       |                   |                                       |                                       |                  |                                       |                                       |            |                                       |                                       |            |                                       |                                       |           |                                       |                                       |          |                                       |                                       |               |                                       |                                       |            |                                       |                                       |                     |                                       |                                       |                 |                                       |                                       |                            |                                       |                                       |                   |                                       |                                       |              |                                       |                                       |  |

**B) CONTRACEPTIVE USE and HIV/STIs**

|     | Questions                                                                                                                            | Responses                                                                                                                                                                                                                                                                                                                         | Skip            |
|-----|--------------------------------------------------------------------------------------------------------------------------------------|-----------------------------------------------------------------------------------------------------------------------------------------------------------------------------------------------------------------------------------------------------------------------------------------------------------------------------------|-----------------|
| B-1 | Did you use a male or female condom the last time you had sexual relations with your husband or live-in sexual partner?              | <input type="checkbox"/> _0 No<br><input type="checkbox"/> _1 Yes, male condom<br><input type="checkbox"/> _2 Yes, fe male condom                                                                                                                                                                                                 |                 |
| B-2 | Apart from condoms, have you been using any other forms of protection against pregnancy during the past two months?                  | <input type="checkbox"/> _0 No<br><input type="checkbox"/> _1 Yes                                                                                                                                                                                                                                                                 | →Check Criteria |
| B-3 | Which method have you been using?                                                                                                    | <input type="checkbox"/> _1 Injectables<br><input type="checkbox"/> _2 Implants<br><input type="checkbox"/> _3 IUD<br><input type="checkbox"/> _4 Pill<br><input type="checkbox"/> _5 Female sterilization<br><input type="checkbox"/> _6 Male sterilization<br><input type="checkbox"/> _7 Other method (                      ) |                 |
| B-4 | Since what month and year have you been using (METHOD ON LIST IN B-3) without stopping?                                              | Month ..... <input type="checkbox"/> <input type="checkbox"/><br><input type="checkbox"/> _88 Don't know month<br><br>Year ..... <input type="checkbox"/> <input type="checkbox"/> <input type="checkbox"/> <input type="checkbox"/><br><input type="checkbox"/> _88 Don't know year                                              |                 |
| B-5 | How often did you and your partner use a male or female condom during the past two months?                                           | <input type="checkbox"/> _0 Never<br><input type="checkbox"/> _1 Sometimes<br><input type="checkbox"/> _2 Almost every time<br><input type="checkbox"/> _3 Every time<br><input type="checkbox"/> _8 Don't know<br><input type="checkbox"/> _9 No response                                                                        |                 |
| B-6 | Have you ever been told by a health care provider that you had HIV and STIs such as chlamydia, gonorrhea, or trichomonas infections? | <input type="checkbox"/> _0 No<br><input type="checkbox"/> _1 Yes<br><input type="checkbox"/> _8 Don't know<br><input type="checkbox"/> _9 No response                                                                                                                                                                            |                 |
